# Supplementary material for: Decreased expression of Yes-associated protein is associated with outcome in the luminal A breast cancer subgroup and with an impaired tamoxifen response
Source: PubMed Central journal article supplement (PMC3937431; doi:10.1186/1471-2407-14-119), 2014-02-22
Supplement: 1471-2407-14-119-S4.pdf [file 1471-2407-14-119-S4.pdf]

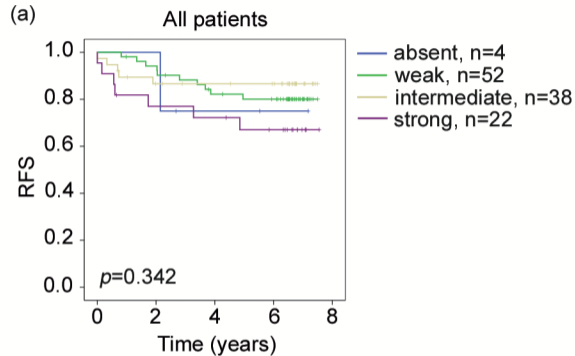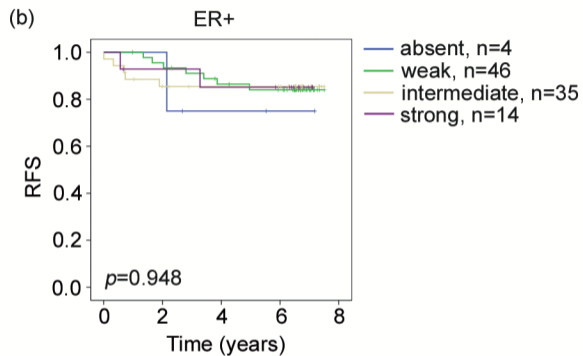

Additional file 4. Kaplan-Meier analysis of the screening cohort. (a) YAP1 expression does not predict outcome in all patients (log-rank test) or in (b) the subgroup of ER+ patients.
