# Supplementary material for: Decreased expression of Yes-associated protein is associated with outcome in the luminal A breast cancer subgroup and with an impaired tamoxifen response
Source: PubMed Central journal article supplement (PMC3937431; doi:10.1186/1471-2407-14-119), 2014-02-22
Supplement: 1471-2407-14-119-S5.pdf [file 1471-2407-14-119-S5.pdf]

**Additional file 5. Cox multivariate regression analysis in the gene expression dataset (n=1107).** YAP1 mRNA expression is an independent prognostic factor after adjustment of known prognostic factors.

| Variable                 | Univariate |             |                | Multivariate |             |                |
|--------------------------|------------|-------------|----------------|--------------|-------------|----------------|
|                          | HR         | 95% CI      | <i>P</i> value | HR           | 95% CI      | <i>P</i> value |
| Grade <sup>†</sup>       | 2.307      | 1.611-3.302 | <0.001         | 1.978        | 1.349-2.902 | <0.001         |
| Tumour size <sup>‡</sup> | 1.533      | 1.196-1.964 | 0.001          | 1.399        | 1.075-1.819 | 0.012          |
| Lymph node <sup>§</sup>  | 1.284      | 0.972-1.697 | 0.078          | 1.209        | 0.894-1.634 | 0.217          |
| YAP1 <sup>*</sup>        | 1.345      | 1.104-1.639 | 0.003          | 1.306        | 1.014-1.683 | 0.039          |

<sup>†</sup> Nottingham histological grade I vs. II and III

<sup>‡</sup> Size  $\leq 20$  vs.  $>20$  mm

<sup>§</sup> Lymph node, negative vs. positive

<sup>\*</sup> High vs. low mRNA expression

HR=Hazard ratio, CI=Confidence interval
