# Supplementary material for: Decreased expression of Yes-associated protein is associated with outcome in the luminal A breast cancer subgroup and with an impaired tamoxifen response
Source: PubMed Central journal article supplement (PMC3937431; doi:10.1186/1471-2407-14-119), 2014-02-22
Supplement: 1471-2407-14-119-S6.pdf [file 1471-2407-14-119-S6.pdf]

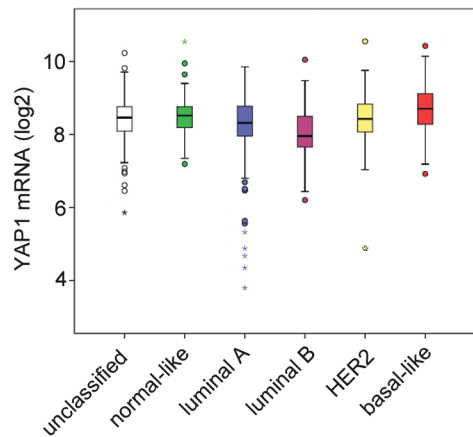

Additional file 6. A box plot showing the interquartile range of YAP1 mRNA in breast cancer molecular subgroups of the gene expression dataset (n=1107). Luminal A and B have significantly lower mRNA expression compared to normal- and basal-like (Kruskal-Wallis Post Hoc test, not assuming equal variances,  $p < 0.001$ ). Luminal B tumours also have lower mRNA expression compared to the HER2 subgroup ( $p < 0.001$ ). There is no statistical difference regarding YAP1 expression in luminal A and B subgroups ( $p = 0.185$ ).
