# Supplementary material for: Decreased expression of Yes-associated protein is associated with outcome in the luminal A breast cancer subgroup and with an impaired tamoxifen response
Source: PubMed Central journal article supplement (PMC3937431; doi:10.1186/1471-2407-14-119), 2014-02-22
Supplement: 1471-2407-14-119-S7.pdf [file 1471-2407-14-119-S7.pdf]

**Additional file 7. Correlations of YAP1 mRNA and a selection of genes (in order) located at the same gene region as *YAP1*; 11q22.** An arbitrary cut-off of Spearman's rho was set at 0.2 since higher correlations coefficients would be more likely to indicate co-deletion with YAP1. Genes chosen for further analysis are highlighted in bold.

| Gene selection of 11q22<br>(in order)<br>mRNA vs. YAP1 mRNA | All subtypes n=1107 |                  | Luminal A subtype n=286 |                  |
|-------------------------------------------------------------|---------------------|------------------|-------------------------|------------------|
|                                                             | Spearman's rho      | P value          | Spearman's rho          | P value          |
| <i>CNTN5</i>                                                | 0.020               | 0.507            | -0.051                  | 0.386            |
| <i>PgR</i>                                                  | -0.003              | 0.921            | 0.150                   | 0.011            |
| <i>YAP1</i>                                                 | 1.00                | -                | 1.00                    | -                |
| <i>BIRC3</i>                                                | 0.065               | 0.030            | 0.182                   | 0.002            |
| <b><i>BIRC2</i></b>                                         | <b>0.399</b>        | <b>&lt;0.001</b> | <b>0.426</b>            | <b>&lt;0.001</b> |
| <b><i>TMEM123</i></b>                                       | <b>0.445</b>        | <b>&lt;0.001</b> | <b>0.442</b>            | <b>&lt;0.001</b> |
| <b><i>MMP7</i></b>                                          | <b>0.227</b>        | <b>&lt;0.001</b> | 0.042                   | 0.475            |
| <i>MMP20</i>                                                | 0.054               | 0.070            | 0.053                   | 0.376            |
| <i>MMP27</i>                                                | -0.005              | 0.873            | -0.089                  | 0.133            |
| <i>MMP13</i>                                                | 0.051               | 0.088            | 0.036                   | 0.548            |
